# Supplementary material for: A Gastric Glycoform of MUC5AC Is a Biomarker of Mucinous Cysts of the Pancreas
Source: PubMed Central journal article supplement (PMC5167232; doi:10.1371/journal.pone.0167070), 2016-12-19
Supplement: pone.0167070.s001.pdf [file pone.0167070.s001.pdf]

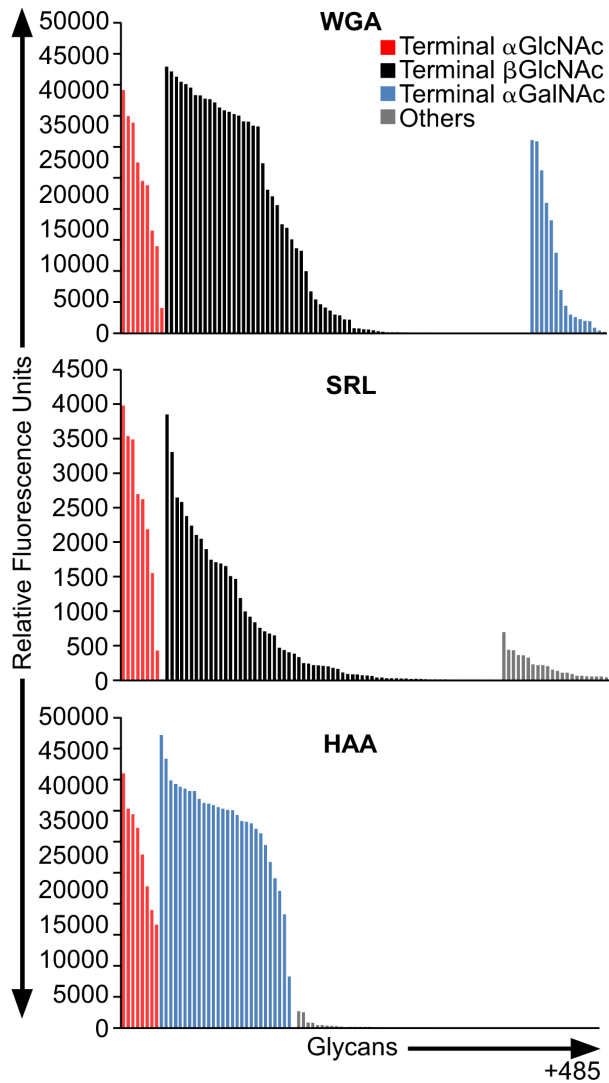

**S1 Fig. Glycan array analysis of lectin specificities.** The glycan synthesis and array core facility of the Consortium for Functional Glycomics (CFG) performed the glycan array experiments and the primary analysis. We downloaded data from [www.functionalglycomics.org](http://www.functionalglycomics.org) that previously had been obtained using lectins and glycan-binding antibodies supplied by various investigators. For detailed analyses of the datasets, we used the Motif Segregation method{porter haab 2010} and the GlycoSearch analysis program (23). The graphs show the fluorescence intensity of various glycans, grouped as indicated by the legend. All 3 lectins share binding to  $\alpha$ GlcNAc (red bars). WGA, wheat-germ agglutinin; SRL, *Sclerotium rolfii* lectin; HAA, *Helix aspersa* agglutinin; GlcNAc, N-acetyl-glucosamine; GalNAc, N-acetyl-galactosamine.
