# Supplementary material for: A Gastric Glycoform of MUC5AC Is a Biomarker of Mucinous Cysts of the Pancreas
Source: PubMed Central journal article supplement (PMC5167232; doi:10.1371/journal.pone.0167070), 2016-12-19
Supplement: pone.0167070.s003.pdf [file pone.0167070.s003.pdf]

S1 Table. Patient Sample Information. IPMN, intraductal papillary mucinous neoplasm; MCN, mucinous cystic neoplasm; SC, serous cystadenoma; PC, pseudocyst; PNET, pancreatic neuroendocrine tumor

| Cohort | Final set | Classification | Cyst Type | Collection Site | Diagnosis                            | Histological Type            | Grade   |
|--------|-----------|----------------|-----------|-----------------|--------------------------------------|------------------------------|---------|
| 0      | 1         | Mucinous       | IPMN      | MSKCC           | IPMN                                 |                              |         |
| 0      | 1         | Mucinous       | cancer    | U. Michigan     | Microscopic foci of invasive         | Microscopic foci of invasive |         |
| 0      | 1         | Mucinous       | MCN       | U. Michigan     | MCN                                  |                              |         |
| 0      | 1         | Non-mucinous   | SC        | U. Michigan     | SC                                   |                              |         |
| 0      | 1         | Non-mucinous   | SC        | U. Michigan     | SC                                   |                              |         |
| 1      | 0         | Mucinous       | IPMN      | MSKCC           | IPMN                                 |                              |         |
| 1      | 1         | Non-mucinous   | PNET      | MSKCC           | PNET                                 |                              |         |
| 1      | 0         | Mucinous       | MCN       | MSKCC           | cancer                               |                              |         |
| 1      | 0         | Mucinous       | MCN       | U. Michigan     | MCN                                  |                              |         |
| 1      | 0         | Non-mucinous   | PC        | U. Michigan     | PC                                   |                              |         |
| 1      | 0         | Mucinous       | IPMN      | UPMC            | IPMN (surgical)                      |                              | adenoCA |
| 1      | 0         | Mucinous       | IPMN      | UPMC            | IPMN (surgical)                      |                              | Low     |
| 1      | 0         | Mucinous       | IPMN      | UPMC            | IPMN (surgical)                      |                              | Mod     |
| 1      | 1         | Mucinous       | IPMN      | UPMC            | IPMN (surgical)                      |                              | Mod     |
| 1      | 0         | Mucinous       | IPMN      | UPMC            | IPMN (surgical)                      |                              | Mod     |
| 1      | 0         | Mucinous       | IPMN      | UPMC            | IPMN (surgical)                      |                              | Low     |
| 1      | 1         | Mucinous       | IPMN      | UPMC            | IPMN (surgical)                      |                              | Mod     |
| 1      | 1         | Mucinous       | IPMN      | UPMC            | IPMN (surgical)                      |                              | Low     |
| 1      | 0         | Mucinous       | IPMN      | UPMC            | IPMN (surgical)                      |                              | Low     |
| 1      | 0         | Mucinous       | IPMN      | UPMC            | IPMN (surgical)                      |                              | Low     |
| 1      | 0         | Mucinous       | IPMN      | UPMC            | IPMN (surgical)                      |                              | Mod     |
| 1      | 1         | Mucinous       | IPMN      | UPMC            | IPMN (surgical)                      |                              | Mod     |
| 1      | 0         | Mucinous       | IPMN      | UPMC            | IPMN (surgical)                      |                              | High    |
| 1      | 0         | Mucinous       | IPMN      | UPMC            | IPMN (surgical)                      |                              | adenoCA |
| 1      | 0         | Mucinous       | IPMN      | UPMC            | IPMN (surgical)                      |                              | adenoCA |
| 1      | 0         | Mucinous       | IPMN      | UPMC            | IPMN (surgical)                      |                              | adenoCA |
| 1      | 1         | Mucinous       | MCN       | UPMC            | MCN (surgical)                       |                              | Low     |
| 1      | 0         | Mucinous       | MCN       | UPMC            | MCN (surgical)                       |                              | Low     |
| 1      | 0         | Mucinous       | MCN       | UPMC            | MCN (surgical)                       |                              | Low     |
| 1      | 0         | Mucinous       | MCN       | UPMC            | MCN (surgical)                       |                              | High    |
| 1      | 1         | Mucinous       | MCN       | UPMC            | MCN (surgical)                       |                              | Low     |
| 1      | 1         | Mucinous       | MCN       | UPMC            | MCN (surgical)                       |                              | Low     |
| 1      | 0         | Non-mucinous   | PC        | UPMC            | pseudocyst                           |                              |         |
| 1      | 1         | Non-mucinous   | PC        | UPMC            | pseudocyst                           |                              |         |
| 1      | 0         | Non-mucinous   | PC        | UPMC            | pseudocyst                           |                              |         |
| 1      | 1         | Non-mucinous   | PC        | UPMC            | pseudocyst                           |                              |         |
| 1      | 1         | Non-mucinous   | PC        | UPMC            | pseudocyst                           |                              |         |
| 1      | 0         | Non-mucinous   | PC        | UPMC            | pseudocyst                           |                              |         |
| 1      | 1         | Non-mucinous   | PC        | UPMC            | pseudocyst                           |                              |         |
| 1      | 1         | Non-mucinous   | PC        | UPMC            | pseudocyst                           |                              |         |
| 1      | 1         | Non-mucinous   | PC        | UPMC            | pseudocyst                           |                              |         |
| 1      | 1         | Non-mucinous   | PC        | UPMC            | pseudocyst                           |                              |         |
| 1      | 1         | Non-mucinous   | PC        | UPMC            | pseudocyst                           |                              |         |
| 1      | 1         | Non-mucinous   | PC        | UPMC            | pseudocyst                           |                              |         |
| 1      | 1         | Non-mucinous   | PC        | UPMC            | pseudocyst                           |                              |         |
| 1      | 1         | Non-mucinous   | PC        | UPMC            | pseudocyst                           |                              |         |
| 1      | 0         | Non-mucinous   | PC        | UPMC            | pseudocyst                           |                              |         |
| 1      | 0         | Non-mucinous   | PNET      | UPMC            | neuroendocrine (surgical)            |                              |         |
| 1      | 0         | Non-mucinous   | PNET      | UPMC            | neuroendocrine (surgical)            |                              |         |
| 1      | 0         | Non-mucinous   | PNET      | UPMC            | neuroendocrine (surgical)            |                              |         |
| 1      | 0         | Non-mucinous   | PNET      | UPMC            | neuroendocrine                       |                              | High    |
| 1      | 0         | Non-mucinous   | SC        | UPMC            | SC (CLIN)                            |                              |         |
| 1      | 0         | Non-mucinous   | SC        | UPMC            | SC (surgical)                        |                              |         |
| 2      | 0         | Mucinous       | IPMN      | UPMC            | IPMN (surgical)                      |                              |         |
| 2      | 0         | Mucinous       | IPMN      | UPMC            | IPMN (surgical)                      |                              |         |
| 2      | 0         | Mucinous       | IPMN      | UPMC            | IPMN (surgical)                      |                              |         |
| 2      | 0         | Mucinous       | IPMN      | UPMC            | IPMN (surgical)                      |                              |         |
| 2      | 0         | Mucinous       | IPMN      | UPMC            | IPMN (surgical)                      |                              |         |
| 2      | 0         | Mucinous       | IPMN      | UPMC            | IPMN (surgical)                      |                              |         |
| 2      | 0         | Mucinous       | IPMN      | UPMC            | IPMN (surgical)                      |                              |         |
| 2      | 0         | Mucinous       | IPMN      | UPMC            | IPMN (surgical)                      |                              |         |
| 2      | 0         | Mucinous       | IPMN      | UPMC            | IPMN (surgical)                      |                              |         |
| 2      | 0         | Mucinous       | IPMN      | UPMC            | IPMN (surgical)                      |                              |         |
| 2      | 1         | Mucinous       | IPMN      | UPMC            | IPMN degenerated into adenocarcinoma |                              |         |
| 2      | 0         | Mucinous       | IPMN      | UPMC            | IPMN (surgical)                      |                              |         |
| 2      | 1         | Mucinous       | IPMN      | UPMC            | IPMN degenerated into adenocarcinoma |                              |         |
| 2      | 0         | Mucinous       | IPMN      | UPMC            | IPMN (surgical)                      |                              |         |



|   |   |              |      |       |                              |                                 |      |
|---|---|--------------|------|-------|------------------------------|---------------------------------|------|
| 3 | 1 | Mucinous     | IPMN | MSKCC | IPMN                         | mixed gastric/intestinal type   | Mod  |
| 3 | 1 | Mucinous     | IPMN | MSKCC | IPMN                         |                                 | Mod  |
| 3 | 1 | Mucinous     | IPMN | MSKCC | IPMN, mixed main/branch duct | gastric type                    | Mod  |
| 3 | 1 | Mucinous     | IPMN | MSKCC | IPMN, main duct              | Carcinoma; intestinal           | High |
| 3 | 1 | Mucinous     | IPMN | MSKCC | IPMN, main duct              | Carcinoma; intestinal           | High |
| 3 | 1 | Mucinous     | IPMN | MSKCC | IPMN                         | gastric type                    | Mod  |
| 3 | 1 | Mucinous     | IPMN | MSKCC | IPMN                         | gastric type                    | Low  |
| 3 | 1 | Mucinous     | IPMN | MSKCC | IPMN, carcinoma (cis)        | gastric type, carcinoma in-situ | High |
| 3 | 1 | Mucinous     | IPMN | MSKCC | IPMN, carcinoma; main duct   | carcinoma                       | High |
| 3 | 0 | Mucinous     | IPMN | MSKCC | IPMN, branch duct            | gastric type                    | Mod  |
| 3 | 1 | Non-mucinous | SC   | MSKCC | SC                           | macrocytic                      |      |
| 3 | 1 | Non-mucinous | SC   | MSKCC | SC                           | microcystic                     |      |
| 3 | 0 | Non-mucinous | SC   | MSKCC | SC                           | macrocytic                      |      |
