# Supplementary material for: A Gastric Glycoform of MUC5AC Is a Biomarker of Mucinous Cysts of the Pancreas
Source: PubMed Central journal article supplement (PMC5167232; doi:10.1371/journal.pone.0167070), 2016-12-19
Supplement: pone.0167070.s004.pdf [file pone.0167070.s004.pdf]

S2 Table. Reagent Information.

| <b>Antibodies</b>    |                       |              |                   |                  |
|----------------------|-----------------------|--------------|-------------------|------------------|
| <b>Name</b>          | <b>Target</b>         | <b>Clone</b> | <b>Source</b>     | <b>Catalog #</b> |
| Anti A4GNT           | A4GNT                 | Polyclonal   | Sigma-Aldrich     | HPA008017        |
| Anti $\alpha$ GlcNAc | alpha-linked GlcNAc   | HIK1083      | Cosmo Bio         | KAN-02101-96-EX  |
| Anti BGH             | Blood Group H antigen | 87-N         | Abcam             | ab24222          |
| Anti Endorepellin    | Endorepellin          | Polyclonal   | R&D Systems       | AF2364           |
| Anti MUC5AC          | MUC5Ac                | 45M1         | Thermo Scientific | MS-145-P1ABX     |
| Anti MUC5AC          | MUC5Ac                | 45M1         | AbD Serotec       | 1695-0128        |
| Anti MUC5AC (Ab2)    | MUC5Ac                | 2-11M1       | Thermo Scientific | MA1-35704        |

| <b>Purified Glycoproteins</b>  |                       |                  |
|--------------------------------|-----------------------|------------------|
| <b>Name</b>                    | <b>Source</b>         | <b>Catalog #</b> |
| Laminin                        | Sigma-Aldrich         | L-6274           |
| Fibronectin                    | Sigma-Aldrich         | F-0895           |
| Transferrin                    | Fitzgerald Industries | 30C-CP4060       |
| Fetuin                         | Sigma-Aldrich         | F2379            |
| Carcinoembryonic Antigen (CEA) | Fitzgerald Industries | 30-AC32          |

| <b>Enzymes</b>                              |                                             |                     |                  |
|---------------------------------------------|---------------------------------------------|---------------------|------------------|
| <b>Name</b>                                 | <b>Target</b>                               | <b>Source</b>       | <b>Catalog #</b> |
| PNGase F                                    | N-glycans                                   | New England Biolabs | P0704S           |
| $\alpha$ 2-3,6,8 Neuraminidase              | $\alpha$ 2-3, 2-6, and 2-8 sialic acid      | New England Biolabs | P0720S           |
| $\beta$ (1-3,4)-galactosidase (Bovine)      | Terminal $\beta$ 1-3, $\beta$ 1-4 galactose | ProZyme             | GKX-5013         |
| $\alpha$ -N-Acetylgalactosaminidase         | Terminal $\alpha$ GalNAc                    | New England Biolabs | P0734S           |
| $\beta$ -N-acetylhexosaminidase (Jack Bean) | Terminal GalNAc and $\beta$ GlcNAc          | ProZyme             | GKX-5003         |

| <b>Lectins</b>                           |                     |                                            |               |                  |
|------------------------------------------|---------------------|--------------------------------------------|---------------|------------------|
| <b>Name</b>                              | <b>Abbreviation</b> | <b>Primary Specificity</b>                 | <b>Source</b> | <b>Catalog #</b> |
| Erythrina cristagalli lectin             | ECL                 | Terminal Gal $\beta$                       | Vector Labs   | BK-3000          |
| Griffonia simplicifolia lectin II        | GSL-II              | Terminal $\alpha$ , $\beta$ -GlcNAc        | Vector Labs   | BK-3000          |
| Helix aspersa agglutinin                 | HAA                 | GlcNAc $\alpha$ , GalNAc $\alpha$          | Sigma-Aldrich | L8764            |
| Ricinus communis agglutinin I            | RCA-1               | Terminal galactose                         | Vector Labs   | BK-1000          |
| Sclerotium rolfisii lectin (recombinant) | SRL                 | Terminal GlcNAc $\beta$ or GlcNAc $\alpha$ | Wako          | 199-17271        |
| Wheat germ agglutinin                    | WGA                 | GlcNAc > sialic acid                       | Vector Labs   | B-1025           |
